# Supplementary material for: Factors affecting the biosynthesis and emission of a Drosophila pheromone
Source: Oxford University Press journal article supplement (doi:10.1242/jeb.244422), 2022-06-09
Supplement: jeb244422supp.pdf [file jeb244422supp.pdf]

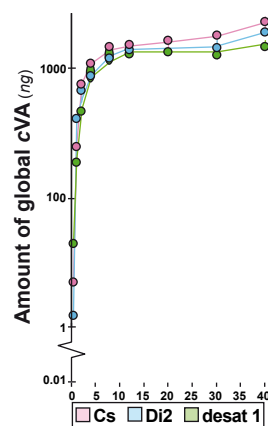

**Fig. S1. Age-related variation in global amounts of *cis*-Vaccenyl Acetate.** The variation of the global amount of *cis*-Vaccenyl Acetate (cVA) was measured (in ng) in males of different ages until 40 days. We compared males of three genotypes: Canton-S (Cs), Dijon 2000 (Di2) and *desat1*<sup>1573</sup> homozygous mutant (*desat1*; see Figure 1). For the sake of clarity, we only show the mean value for each age and genotype. *N* = 5-10.

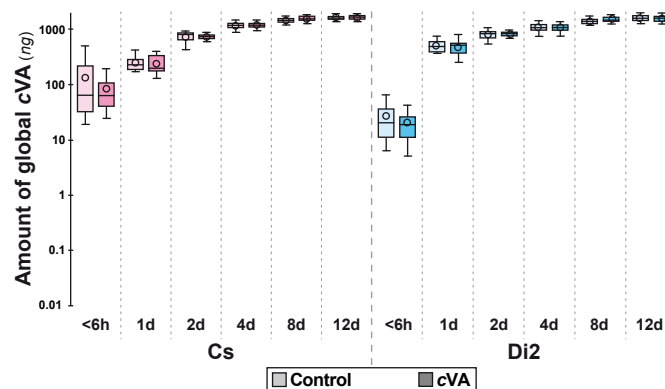

**Fig. S2. Effects of preimaginal exposure to synthetic *cis*-Vaccenyl Acetate (cVA) on global cVA.** We compared cVA levels in wild type Canton-S (Cs) and Dijon 2000 (Di2) males at various ages. These males underwent preimaginal development either on plain food (“Control”) or on food with added 15ng cVA /mm<sup>3</sup> food (“cVA”). Immediately after adult eclosion, all males were transferred onto regular food. Data are shown as box and whisker diagrams. The lower and upper box edges represent the first and third quartiles, while the median value is indicated by the inner small horizontal bar and the mean by the plain dot. The ends of the whiskers shown below and above each box represent the limits beyond which values were considered anomalous. We used the Mann-Whitney test to compare the food effect at each age and for each genotype.  $N = 15$  flies except for 2- and 4-day old Di2 flies ( $N = 19-45$  flies). No effect of preimaginal diet was observed. For more information, refer to the legends of Figures 1 and 2.

### Dataset 1.

[Click here to download Dataset 1](#)
